# Supplementary material for: Systematic comparison of high-throughput single-cell RNA-seq methods for immune cell profiling
Source: BMC Genomics. 2021 Jan 20;22:66. doi: 10.1186/s12864-020-07358-4 (PMC7818754; doi:10.1186/s12864-020-07358-4)
Supplement: Supplementary file 3 — Additional file 3: Supplement Table 2. Sample summary. [file 12864_2020_7358_MOESM3_ESM.xlsx]

## Sheet: Sheet1
Sample ID	Method	Cell Mixture	EL4 % viabile	IVA12 % viable	Jurkat % viable	TALL % viable	nCells Input
1	10x 3' v2	A	93	95	96	50	8700
2	10x 3' v2	A	93	95	96	50	3500
21	10x 3' v3	F	98	93	99	65	4800
22	10x 3' v3	G	98	93	99	65	4800
23	10x 3' v3	F	98	93	99	65	9600
24	10x 3' v3	G	98	93	99	65	9600
5	10x 5' v1	B	89	92	99	89	8700
6	10x 5' v1	B	89	92	99	89	3500
9	ddSEQ	C	98	98	95	71	9000
10	ddSEQ	C	98	98	95	71	9000
11	ddSEQ	C	98	98	95	71	11250
12	ddSEQ	C	98	98	95	71	11250
13	ddSEQ	D	98	98	95	71	11250
14	ddSEQ	D	98	98	95	71	11250
15	ddSEQ	D	98	98	95	71	11250
16	ddSEQ	D	98	98	95	71	11250
19	Drop-seq	E	95	86	92	80	90000
20	Drop-seq	E	95	86	92	80	180000
27	ICELL8 3' DE	H	98	94	97	76	17920
28	ICELL8 3' DE	I	95	63	97	70	17920
29	ICELL8 3' DE-UMI	I	95	63	97	70	17920
Supplemental Table 2
